# Supplementary material for: Engineering of a GSH activatable photosensitizer for enhanced photodynamic therapy through disrupting redox homeostasis
Source: Royal Society of Chemistry journal article supplement (doi:10.1039/d3ra04074g), 2023-01-01
Supplement: d3ra04074g1.pdf [file d3ra04074g1.pdf]

**Engineering of a GSH activatable photosensitizer for enhanced photodynamic therapy through  
disrupting redox homeostasis**

Datian Fu <sup>a, 1</sup>, Yan Wang <sup>a, 1</sup>, Kaiwen Lin <sup>a</sup>, Liangjiu Huang <sup>b</sup>, Jin Xu <sup>c</sup>, Haimei Wu <sup>b, \*</sup>

<sup>a</sup> Department of Pharmacy, Hainan women and children's medical center, Haikou, Hainan 570100, China.

<sup>b</sup> Department of Clinical Pharmacy, Hainan Cancer Hospital, Haikou, Hainan 570100, China.

<sup>c</sup> Pharmaceutical and bioengineering school, Hunan Chemical Vocational Technology College, Zhuzhou, 412006, China

\* Corresponding authors:

Haimei Wu, E-mail: wu634202863@126.com

<sup>1</sup> These authors contribute equally to this work.

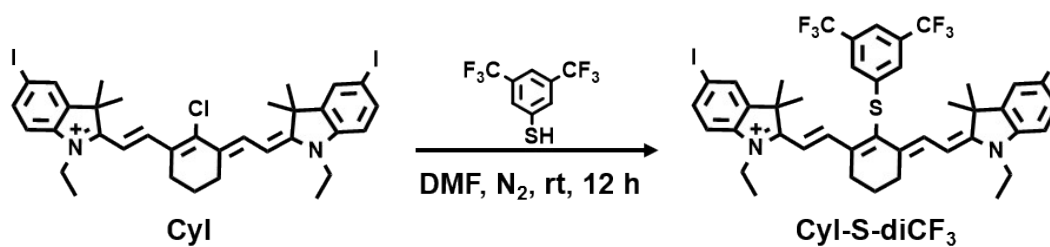

**Fig. S1** The synthesis route of CyI-S-diCF<sub>3</sub>.

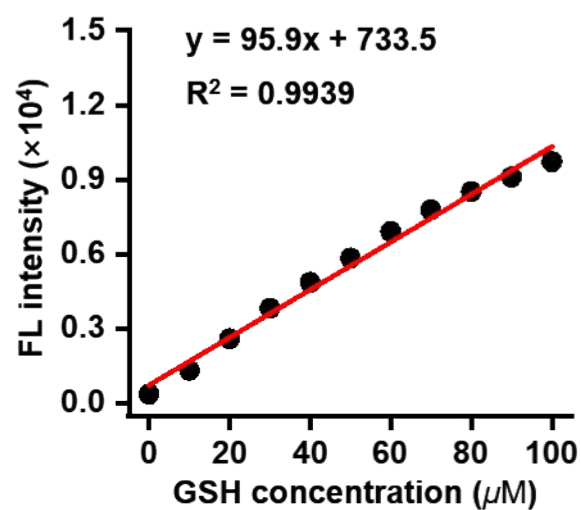

**Fig. S2** The linear plot of fluorescence intensity of CyI-S-diCF<sub>3</sub> (10  $\mu$ M) in the presence of various concentrations of GSH (0-100  $\mu$ M).

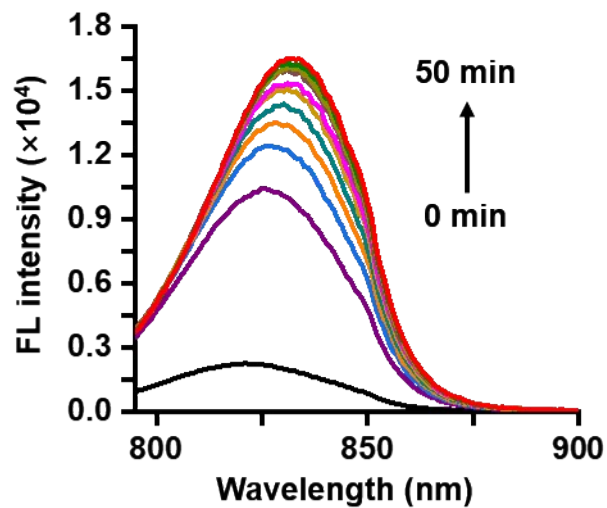

**Fig. S3** Time-dependent NIR fluorescence spectra of CyI-S-diCF<sub>3</sub> (10  $\mu$ M) in PBS (10 mM, pH 7.4, 30% DMSO) after incubation with GSH (100  $\mu$ M) at 37  $^{\circ}$ C for varied time.

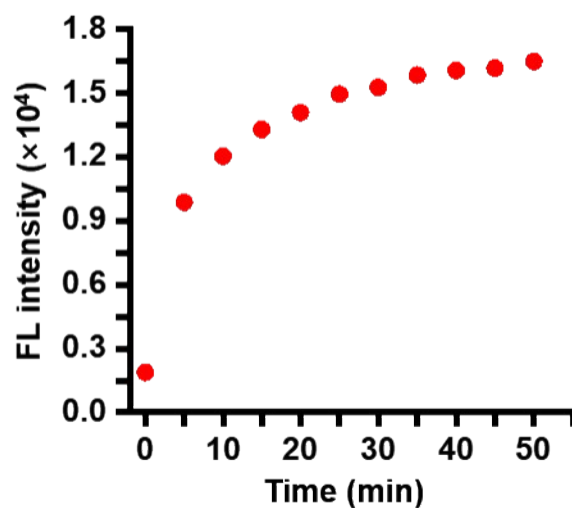

**Fig. S4** The corresponding plot of fluorescence intensity of CyI-S-diCF<sub>3</sub> after treated with GSH (100  $\mu$ M) at 37  $^{\circ}$ C within 50 min.

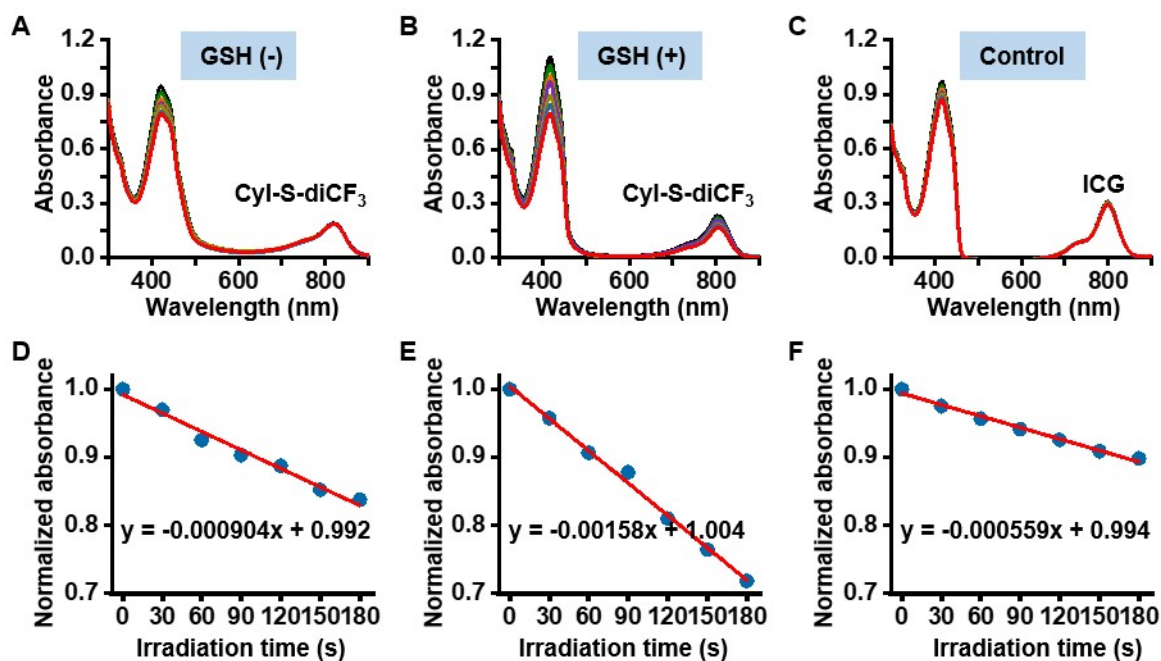

**Fig. S5** The singlet oxygen quantum yield calculation. DPBF absorbance change at 418 nm induced by (A) CyI-S-diCF<sub>3</sub> without GSH, (B) CyI-S-diCF<sub>3</sub> treated with GSH (100  $\mu$ M), and (C) ICG after 808 nm

irradiation. (D-F) The corresponding linear calibration curve for the absorbance of DPBF to illumination time.

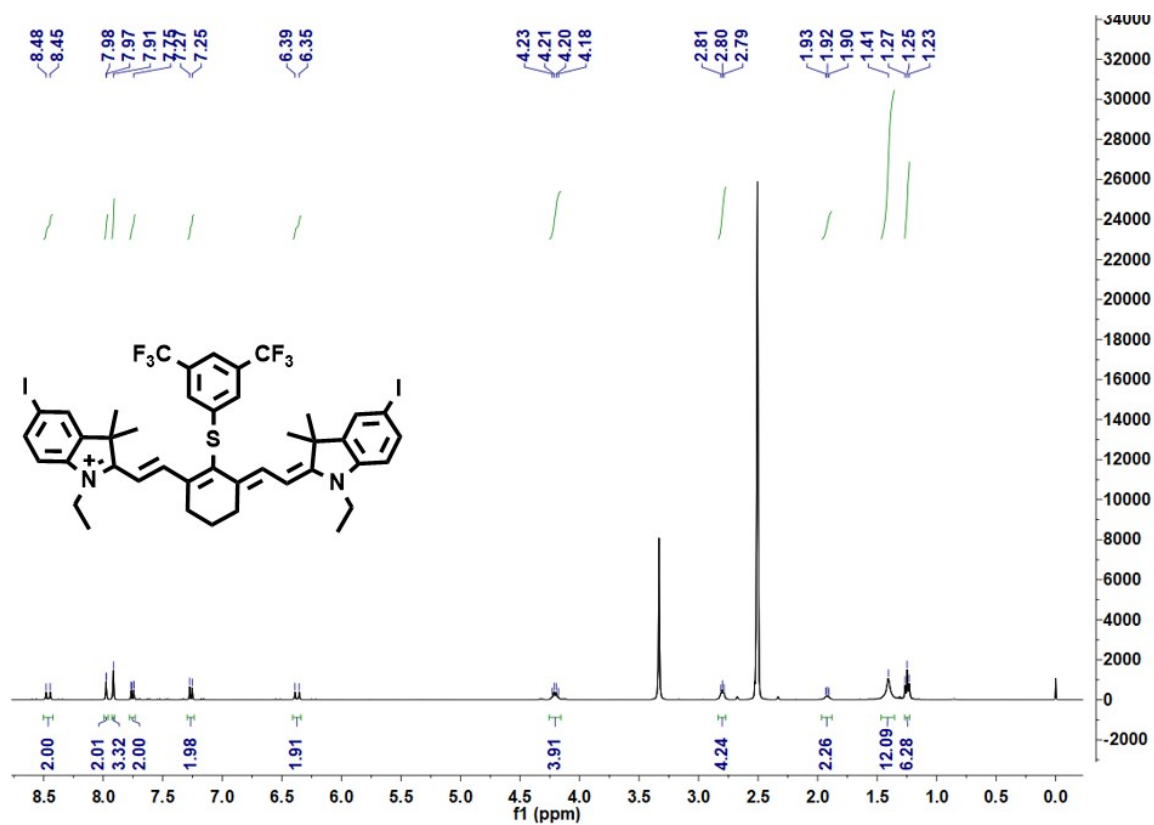

Fig. S6 <sup>1</sup>H NMR spectra of CyI-S-diCF<sub>3</sub>.

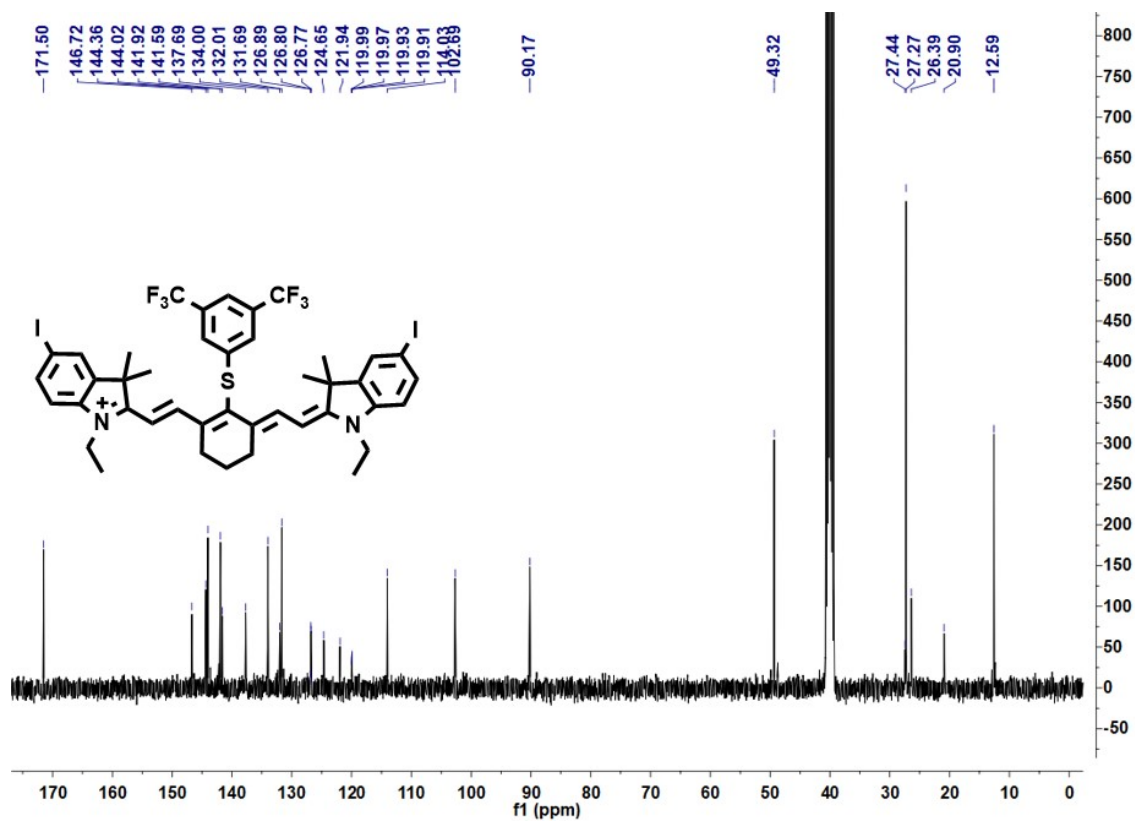

Fig. S7 <sup>13</sup>C NMR spectra of CyI-S-diCF<sub>3</sub>.

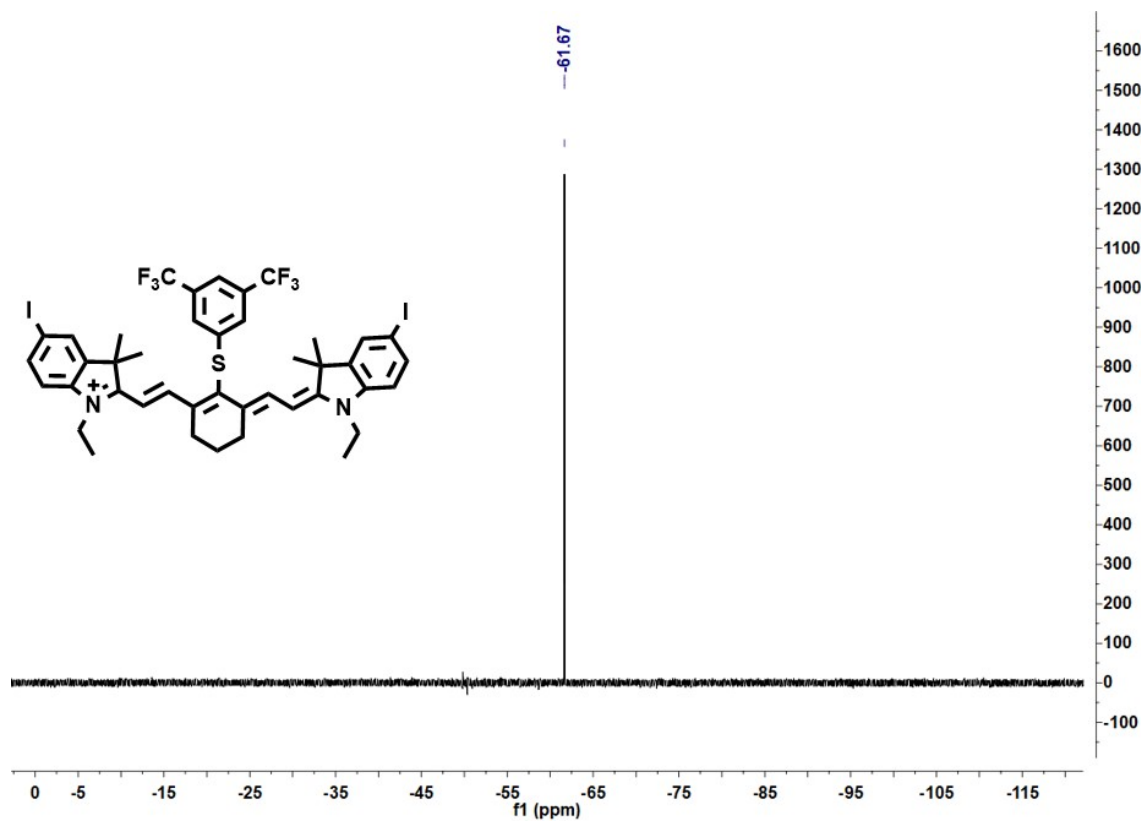

Fig. S8 <sup>19</sup>F NMR spectra of CyI-S-diCF<sub>3</sub>.

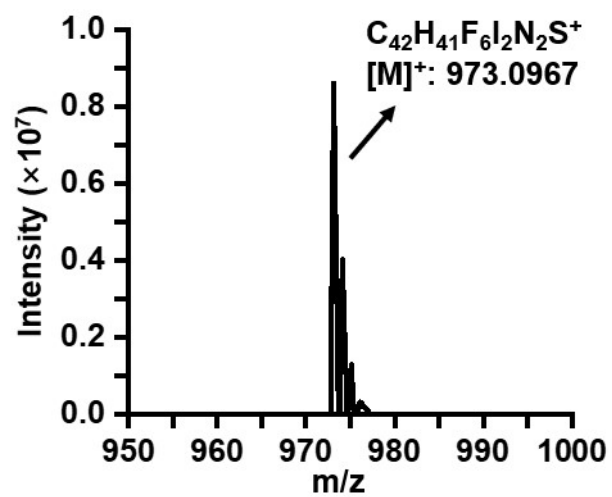

Fig. S9 ESI-HRMS spectrum of Cyl-S-diCF<sub>3</sub>.
